# Supplementary material for: Fluoroalkylated mononuclear ortho-metallated mesogens: new molecules at the calamitic–discotic cross-over point
Source: Royal Society of Chemistry journal article supplement (doi:10.1039/b511832h), 2005-11-24

### Experimental conditions for X-ray scattering

Powder X-ray investigations were carried out with a Guinier film camera and a Guinier Goniometer (Huber Diffraktionstechnik, Germany). Samples in glass capillaries ( $\varnothing$  1 mm) in a temperature-controlled heating stage, quartz-monochromatized  $\text{CuK}\alpha$  radiation, 30 to 60 min exposure time, calibration with the powder pattern of  $\text{Pb}(\text{NO}_3)_2$ . 2D patterns for aligned samples on a glass plate on a temperature-controlled heating stage (alignment at the sample – glass or at the sample – air interface) were recorded with a 2D detector (HI-STAR, Siemens) using  $\text{CuK}\alpha$  radiation monochromatized by a Ni filter.

**Table S1.** X-ray data from Guinier powder patterns ( $\theta_{\text{obs}}$ : experimental scattering angle;  $d_{\text{obs}}$ : experimental and  $d_{\text{calc}}$ : calculated d spacing;  $hk/n$ : assigned indices for  $\text{Col}_{\text{hex}}$  phases / order of reflection for SmA phases, Parameter used: Lattice parameters or  $d$  values used to calculate  $d_{\text{calc}}$  with an error of the calculated parameters in the order of 0.1 nm)

| Compound   | $T$<br>(°C) | Phase                     | $\theta_{\text{obs}}$<br>(°) | $d_{\text{obs}}$<br>(nm) | $hk/n$ | $d_{\text{calc}}$<br>(nm) | $d_{\text{obs}} - d_{\text{calc}}$<br>(nm) | Parameter<br>used (nm) |
|------------|-------------|---------------------------|------------------------------|--------------------------|--------|---------------------------|--------------------------------------------|------------------------|
| <b>9b</b>  | 170         | $\text{Col}_{\text{hex}}$ | 1.816                        | 2.43                     | 10     | 2.43                      | 0.00                                       | $a = 2.81$             |
|            | 150         |                           | 1.831                        | 2.41                     | 10     | 2.43                      | -0.02                                      | $a = 2.81$             |
|            |             |                           | 3.120                        | 1.41                     | 11     | 1.40                      | 0.01                                       |                        |
|            |             |                           | 3.625                        | 1.22                     | 20     | 1.21                      | 0.01                                       |                        |
|            | 130         |                           | 1.837                        | 2.40                     | 10     | 2.42                      | -0.02                                      | $a = 2.80$             |
|            |             |                           | 3.150                        | 1.40                     | 11     | 1.40                      | 0.00                                       |                        |
|            |             |                           | 3.625                        | 1.22                     | 20     | 1.21                      | 0.01                                       |                        |
|            | 110         |                           | 1.844                        | 2.39                     | 10     | 2.41                      | -0.02                                      | $a = 2.78$             |
|            |             |                           | 3.162                        | 1.40                     | 11     | 1.39                      | 0.01                                       |                        |
|            |             |                           | 3.650                        | 1.21                     | 20     | 1.20                      | 0.01                                       |                        |
| <b>9a</b>  | 72          | ?                         | 1.871                        | 2.36                     |        |                           |                                            |                        |
| <b>11a</b> | 102         | SmA                       | 1.414                        | 3.12                     | 1      | 3.13                      | -0.01                                      | $d = 3.13$             |
|            |             |                           | 2.813                        | 1.57                     | 2      | 1.56                      | 0.01                                       |                        |
|            | 92          |                           | 1.399                        | 3.16                     | 1      | 3.16                      | 0.00                                       | $d = 3.16$             |
|            |             |                           | 2.800                        | 1.58                     | 2      | 1.58                      | 0.00                                       |                        |
| <b>11b</b> | 130         | SmA                       | 1.374                        | 3.21                     | 1      |                           |                                            | $d = 3.21$             |
|            | 120         |                           | 1.365                        | 3.23                     | 1      |                           |                                            | $d = 3.23$             |
|            | 110         |                           | 1.345                        | 3.28                     | 1      |                           |                                            | $d = 3.28$             |

**Figure S1.** The inner diffuse scattering in the SmA phase of **11b**: **a)** diffuse X-ray scattering scanned along a conical segment ( $\Delta\chi = 60^\circ$ ) of the 2D-pattern about a line perpendicular to the layer normal, **b)** distribution of the intensity integrated over  $\theta$  from  $3.2$  to  $3.9^\circ$  ( $d \approx 2.50$  nm) showing a fit by two Gaussian functions and the corresponding position of the intensity maxima, **c)** distribution of the intensity for the outer diffuse scattering integrated over  $\theta$  from  $7.5$  to  $10.5^\circ$  ( $d \approx 0.50$  nm, maxima at about  $116$  and  $298^\circ$ ) for comparison, [**b)** and **c)**: relative intensity calculated by  $I_{\text{rel}} = I(120^\circ\text{C}) / I(\text{isotropic liquid})$ . The black arrow points to the position of the intensity maximum for the layer reflections.]

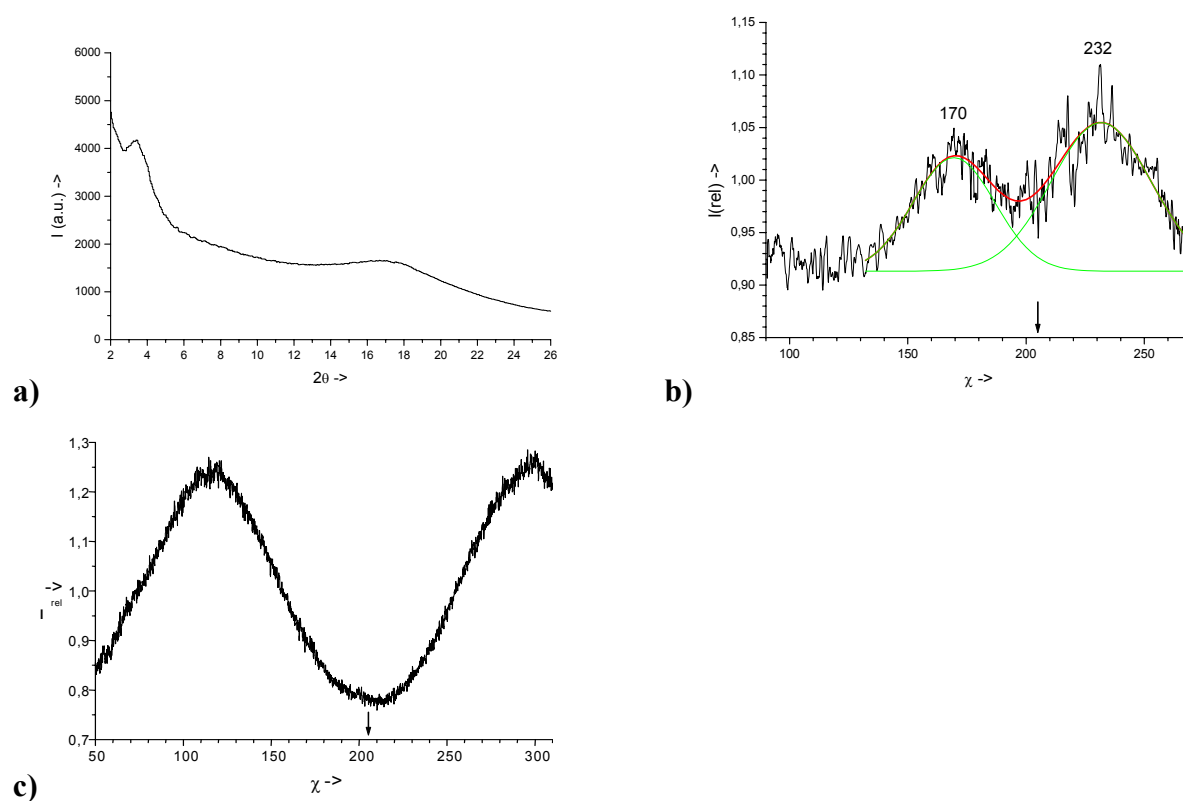

Supplement: b511832h.pdf [file b511832h.pdf]
